# Supplementary material
Source: publisher figshare collection journal article supplement (https://karger.figshare.com/ndownloader/files/14107859)
Supplement: Supplementary file 1 [file 14107859]

**Table e-1**

**PD Patient Demographics**

| **Patient No.** |  | **Gender** |  | **Age at Diagnosis**  **(years)** |  | **Age at surgery (years)** |  | **Procedure** |  | **UPDRS III - Pre-op**  **OFF/ON meda** |  | **UPDRS III - Post-op**  **On med-ON stimb** |  | **LEDD**  **Pre/Post-op** |
| --- | --- | --- | --- | --- | --- | --- | --- | --- | --- | --- | --- | --- | --- | --- |
| PD1 |  | M |  | 30 |  | 44 |  | Bilateral STN |  | 57/20 |  | 19 |  | 650/350 |
| PD2 |  | M |  | 59 |  | 68 |  | Bilateral STN |  | 40/11 |  | 6 |  | 1396.5/550 |
| PD3 |  | M |  | 59 |  | 61 |  | Bilateral STN |  | 36/13 |  | 9 |  | 3244/1050 |
| PD4 |  | M |  | 56 |  | 64 |  | Bilateral STN |  | 43/16 |  | 10 |  | 1814/948 |
| PD5 |  | M |  | 50 |  | 60 |  | Bilateral STN |  | 36/20 |  | 16 |  | 750/750 |
| PD6c |  | F |  | 45 |  | 55 |  | Bilateral STN |  | 38/17 |  | 18 |  | 300/375 |
| PD7 |  | M |  | 46 |  | 52 |  | Bilateral STN |  | 39/15 |  | 17 |  | 2594/1300 |
| PD8 |  | M |  | 47 |  | 54 |  | Bilateral STN |  | 61/12 |  | 29 |  | 1031/300 |
| PD9 |  | M |  | 40 |  | 45 |  | Bilateral STN |  | 30/7 |  | 4 |  | 1042.5/0 |
| PD10 |  | M |  | 42 |  | 49 |  | Bilateral STN |  | 37/19 |  | 19 |  | 2320/1550 |
| PD11 |  | M |  | 47 |  | 67 |  | Bilateral STN |  | 34/14 |  | 18 |  | 750/200 |
| PD12 |  | M |  | 50 |  | 62 |  | Bilateral STN |  | 39/11 |  | 21 |  | 1500/800 |
| PD13c |  | M |  | 56 |  | 70 |  | Bilateral STN |  | 41/19 |  | 46 |  | 400/200 |
| PD14 |  | M |  | 43 |  | 66 |  | Bilateral STN |  | 44/20 |  | 16 |  | 1365/950 |
| PD15 |  | M |  | 54 |  | 63 |  | Bilateral STN |  | 38/22 |  | 19 |  | 3100/1950 |
| PD16 |  | M |  | 58 |  | 65 |  | Bilateral STN |  | 40/19 |  | 24 |  | 1497.5/748.5 |
| PD17 |  | F |  | 38 |  | 52 |  | Bilateral STN |  | 33/10 |  | 21 |  | 670/520 |
| PD18d |  | F |  | 38 |  | 42 |  | Bilateral STN |  | 39/30 |  | 20 |  | 1200/0 |
| PD19 |  | F |  | 57 |  | 72 |  | Unilateral Left STN |  | 30/14 |  | 19 |  | 1878/630 |
| PD20 |  | M |  | 66 |  | 70 |  | Unilateral Left STN |  | 26/14 |  | 13 |  | 650/650 |
| PD21 |  | M |  | 45 |  | 51 |  | Bilateral STN |  | 60/22 |  | 5 |  | 1125/550 |
| PD22 |  | F |  | 42 |  | 49 |  | Bilateral STN |  | __/__f |  | 23g |  | __f/50 |
| PD23e |  | F |  | 45 |  | 53 |  | Bilateral STN |  | 48/12 |  | 11 |  | 1330/665 |
| PD24 |  | F |  | 45 |  | 56 |  | Bilateral STN |  | 51/13 |  | 21 |  | 1200/300 |
| PD25 |  | M |  | 48 |  | 59 |  | Unilateral Left STN |  | 28/14 |  | 16 |  | 1214/950 |
| PD26 |  | M |  | 40 |  | 49 |  | Bilateral STN |  | 36/19 |  | 7 |  | 600/600 |
| PD27 |  | F |  | 52 |  | 61 |  | Bilateral STN |  | 49/19 |  | 13 |  | 600/600 |

Abbreviations: aAssessed at pre-operative evaluation; bPost-operative assessment performed at 6 months;  cPatients with staged procedures separated by 2 and 5 years; their age is listed after having bilateral implantation; d Parkinsonism potentially due to enlarged Virchow -Robin spaces; e Patient with a LRRK2 mutation; F: female; f DBS performed at a different site and data not available; g Assessed at 1 year; F: female, LEDD: Levodopa equivalent daily dose; M: male; PD: Parkinson’s disease; STN: subthalamic nucleus.
